# Supplementary material
Source: PubMed Central journal article supplement (PMC7597671)
Supplement: NIHMS1031406-supplement-Supplemental_Tables.pdf [file NIHMS1031406-supplement-Supplemental_Tables.pdf]

Table S1: Pre and Post workshop IAT scores, and their differences, by Group Identity and Gender—Study 1

|                                  |                        | Group Identity       |           |                        |           |                    |           | Across Identity |           |
|----------------------------------|------------------------|----------------------|-----------|------------------------|-----------|--------------------|-----------|-----------------|-----------|
|                                  |                        | Majority<br>(n = 54) |           | Non-Target<br>(n = 31) |           | Target<br>(n = 11) |           |                 |           |
|                                  |                        | <u>M</u>             | <u>SD</u> | <u>M</u>               | <u>SD</u> | <u>M</u>           | <u>SD</u> | <u>M</u>        | <u>SD</u> |
| <b>Pre Workshops<sup>1</sup></b> |                        |                      |           |                        |           |                    |           |                 |           |
|                                  | <b>Male (n = 45)</b>   | 0.31***              | 0.25      | 0.26*                  | 0.36      | -0.11              | 0.64      | 0.16*           | 0.35      |
|                                  | <b>Female (n = 51)</b> | 0.10                 | 0.46      | 0.27**                 | 0.25      | -0.11              | 0.51      | 0.08            | 0.41      |
|                                  | <b>Across Gender</b>   | 0.20***              | 0.37      | 0.27***                | 0.29      | -0.11              | 0.54      | 0.12            | 0.38      |
| <b>Post Workshops</b>            |                        |                      |           |                        |           |                    |           |                 |           |
|                                  | <b>Male (n = 45)</b>   | 0.25                 | 0.26      | 0.18                   | 0.28      | 0.12               | 0.41      | 0.18            | 0.35      |
|                                  | <b>Female (n = 51)</b> | -0.04                | 0.48      | 0.19*                  | 0.34      | -0.20              | 0.23      | -0.02           | 0.42      |
|                                  | <b>Across Gender</b>   | 0.11*                | 0.45      | 0.18**                 | 0.32      | -0.04              | 0.35      | 0.08            | 0.40      |
| <b>Difference<sup>2</sup></b>    |                        |                      |           |                        |           |                    |           |                 |           |
|                                  | <b>Male (n = 45)</b>   | -0.05                | 0.39      | -0.08                  | 0.43      | 0.22               | 0.22      | 0.03            | 0.43      |
|                                  | <b>Female (n = 51)</b> | -0.14                | 0.44      | -0.08                  | 0.38      | -0.09              | 0.59      | -0.10           | 0.43      |
|                                  | <b>Across Gender</b>   | -0.09                | 0.41      | -0.08                  | 0.39      | 0.07               | 0.62      | -0.04           | 0.43      |

*Note 1.* All means were adjusted means derived from a model including participant group identity, and participant gender. The values in the bottom right corner are the average pre-workshop IAT d-score adjusting for participant group identity, and participant gender. Significance markers refer to the test of the adjusted mean from 0. <sup>+</sup> p <.10; \* p < .05; \*\*p < .01; \*\*\*p < .001.

*Note 2.* Difference scores were calculated post-workshop minus pre-workshop so that negative scores indicate a reduction in implicit bias after the workshop. Significance markers refer to the test of the adjusted mean (or mean difference score) from zero. <sup>+</sup> p <.10; \* p < .05; \*\*p < .01; \*\*\*p < .001.

Table S2: Pre and Post workshop IAT scores, and their differences, by Group Identity and Gender—Study 2

|                                  | Group Identity       |           |                        |           |                   |           |                 |           |  |
|----------------------------------|----------------------|-----------|------------------------|-----------|-------------------|-----------|-----------------|-----------|--|
|                                  | Majority<br>(n = 23) |           | Non-Target<br>(n = 11) |           | Target<br>(n = 5) |           | Across Identity |           |  |
|                                  | <u>M</u>             | <u>SD</u> | <u>M</u>               | <u>SD</u> | <u>M</u>          | <u>SD</u> | <u>M</u>        | <u>SD</u> |  |
| <b>Pre Workshops<sup>1</sup></b> |                      |           |                        |           |                   |           |                 |           |  |
| Male (n = 21)                    | 0.56***              | 0.32      | 0.19                   | 0.44      | -0.28             | 0.45      | 0.16            | 0.47      |  |
| Female (n = 18)                  | 0.20                 | 0.46      | 0.10                   | 0.20      | 0.37              | 0.06      | 0.22*           | 0.37      |  |
| Across Gender                    | 0.38***              | 0.43      | 0.14                   | 0.29      | 0.05              | 0.48      | 0.19*           | 0.42      |  |
| <b>Post Workshops</b>            |                      |           |                        |           |                   |           |                 |           |  |
| Male (n = 21)                    | 0.25*                | 0.32      | 0.45*                  | 0.22      | 0.05              | 0.15      | 0.25*           | 0.30      |  |
| Female (n = 18)                  | 0.06                 | 0.42      | 0.12                   | 0.22      | 0.26              | 0.11      | 0.15            | 0.34      |  |
| Across Gender                    | 0.15*                | 0.38      | 0.29                   | 0.27      | 0.16              | 0.17      | 0.20**          | 0.33      |  |
| <b>Difference<sup>2</sup></b>    |                      |           |                        |           |                   |           |                 |           |  |
| Male (n = 21)                    | -0.31*               | 0.44      | 0.26                   | 0.30      | 0.33              | 0.39      | 0.09            | 0.49      |  |
| Female (n = 18)                  | -0.14                | 0.52      | 0.02                   | 0.34      | -0.11             | 0.05      | -0.08           | 0.43      |  |
| Across Gender                    | -0.23*               | 0.48      | 0.14                   | 0.34      | 0.11              | 0.37      | 0.01            | 0.45      |  |

*Note 1.* All means were adjusted means derived from a model including participant group identity, and participant gender.. The values in the bottom right corner are the average pre-workshop IAT d-score adjusting for participant group identity, and participant gender. Significance markers refer to the test of the adjusted mean from 0. <sup>+</sup> p <.10;\* p < .05; \*\*p < .01; \*\*\*p < .001.

*Note 2.* Difference scores were calculated post-workshop minus pre-workshop so that negative scores indicate a reduction in implicit bias after the workshop. Significance markers refer to the test of the adjusted mean (or mean difference score) from zero. <sup>+</sup> p <.10;\* p < .05; \*\*p < .01; \*\*\*p < .001.

Table S3. Bivariate Correlations and Descriptive Statistics- White Females

Active workshops for reducing implicit bias 33

|                | 1      | 2     | 3     | 4     | 5      | 6     | 7     | 8      | 9     | 10     | 11    | 12   | 13    |
|----------------|--------|-------|-------|-------|--------|-------|-------|--------|-------|--------|-------|------|-------|
| 1. Pre IAT     | -      |       |       |       |        |       |       |        |       |        |       |      |       |
| 2. Post IAT    | .50**  | -     |       |       |        |       |       |        |       |        |       |      |       |
| 3. IAT Change  | -.49** | .51** | -     |       |        |       |       |        |       |        |       |      |       |
| 4. Age         | -.14   | -.24  | -.10  | -     |        |       |       |        |       |        |       |      |       |
| 5. IMCP        | .04    | .12   | .08   | -.18  | -      |       |       |        |       |        |       |      |       |
| 6. EMCP        | .04    | -.02  | -.07  | .08   | -.07   | -     |       |        |       |        |       |      |       |
| 7. PT          | .02    | -.08  | -.10  | .07   | .64*** | .22   | -     |        |       |        |       |      |       |
| 8. Lay Theory  | .15    | -.12  | -.26  | .06   | -.41*  | .33*  | -.12  | -      |       |        |       |      |       |
| 9. CB Ideology | .18    | .15   | -.03  | .28   | -.28   | .23   | -.21  | .39*   | -     |        |       |      |       |
| 10. Direct     | .03    | .03   | .00   | -.04  | .47**  | .24   | .52** | -.29   | -.01  | -      |       |      |       |
| 11. Indirect   | -.07   | .16   | .23   | -.20  | .55*** | .15   | .54** | -.46** | -.05  | .74*** | -     |      |       |
| 12. Overcomp.  | .00    | -.07  | -.07  | .12   | .28    | .32   | .29   | .00    | -.05  | .20    | .26   | -    |       |
| 13. Escape     | .04    | .00   | -.04  | -.20  | .00    | .25   | -.13  | .10    | .05   | .13    | .11   | .29  | -     |
| M              | 0.13   | -0.01 | -0.14 | 24.73 | 29.24  | 19.49 | 38.95 | 13.43  | 13.03 | 10.95  | 10.95 | 7.22 | 10.11 |
| SD             | 0.46   | 0.46  | 0.46  | 3.51  | 6.42   | 6.16  | 6.12  | 6.40   | 5.57  | 2.53   | 2.75  | 2.62 | 4.89  |

*Note.* IMCP- Internal Motivation to Control Prejudice, EMCP- External Motivation to Control prejudice, PT- Perspective Taking, CB- Colorblind Ideology. Direct, Indirect, Overcompensation and Escape are all strategies for handling an uncomfortable interracial interaction. \*  $p < .05$ ; \*\* $p < .01$ ; \*\*\* $p < .001$

Table S4. Bivariate Correlations and Descriptive Statistics- White Males

Active workshops for reducing implicit bias 35

|                | 1       | 2      | 3     | 4     | 5      | 6     | 7      | 8     | 9     | 10     | 11    | 12     | 13   |
|----------------|---------|--------|-------|-------|--------|-------|--------|-------|-------|--------|-------|--------|------|
| 1. Pre IAT     | -       |        |       |       |        |       |        |       |       |        |       |        |      |
| 2. Post IAT    | .15     | -      |       |       |        |       |        |       |       |        |       |        |      |
| 3. IAT Change  | -.57*** | .73*** | -     |       |        |       |        |       |       |        |       |        |      |
| 4. Age         | .17     | .20    | .05   | -     |        |       |        |       |       |        |       |        |      |
| 5. IMCP        | .10     | .16    | .06   | -.04  | -      |       |        |       |       |        |       |        |      |
| 6. EMCP        | .23     | .09    | -.09  | -.35* | .17    | -     |        |       |       |        |       |        |      |
| 7. PT          | -.14    | -.01   | .09   | -.24  | .49**  | .09   | -      |       |       |        |       |        |      |
| 8. Lay Theory  | -.03    | .20    | .19   | -.02  | -.22   | .06   | -.09   | -     |       |        |       |        |      |
| 9. CB Ideology | .26     | .12    | -.08  | .27   | -.22   | -.11  | -.04   | .24   | -     |        |       |        |      |
| 10. Direct     | -.05    | .16    | .16   | .06   | .62*** | .01   | .48**  | -.14  | -.37* | -      |       |        |      |
| 11. Indirect   | -.19    | .16    | .27   | -.07  | .55*** | .03   | .78*** | -.10  | .02   | .44**  | -     |        |      |
| 12. Overcomp.  | .19     | .10    | -.05  | -.03  | -.03   | .47** | -.17   | .34*  | .09   | -.28   | -.07  | -      |      |
| 13. Escape     | .26     | .32*   | .09   | .22   | -.21   | .12   | -.21   | .24   | .50** | -.42** | -.12  | .53*** | -    |
| M              | 0.38    | 0.25   | -0.12 | 25.40 | 29.75  | 16.40 | 38.95  | 12.90 | 12.90 | 11.47  | 11.65 | 6.80   | 8.00 |
| SD             | 0.29    | 0.35   | 0.42  | 4.73  | 4.94   | 6.63  | 7.86   | 5.52  | 4.80  | 2.45   | 2.21  | 2.69   | 4.35 |

*Note.* IMCP- Internal Motivation to Control Prejudice, EMCP- External Motivation to Control prejudice, PT- Perspective Taking, CB- Colorblind Ideology. Direct, Indirect, Overcompensation and Escape are all strategies for handling an uncomfortable interracial interaction. \*  $p < .05$ ; \*\* $p < .01$ ; \*\*\* $p < .001$



Table S5. Bivariate Correlations and Descriptive Statistics- Non-Target Minority Females Active workshops for reducing implicit bias 37

|                | 1      | 2      | 3     | 4     | 5     | 6     | 7     | 8     | 9     | 10     | 11    | 12   | 13   |
|----------------|--------|--------|-------|-------|-------|-------|-------|-------|-------|--------|-------|------|------|
| 1. Pre IAT     | -      |        |       |       |       |       |       |       |       |        |       |      |      |
| 2. Post IAT    | .16    | -      |       |       |       |       |       |       |       |        |       |      |      |
| 3. IAT Change  | -.54** | .74*** | -     |       |       |       |       |       |       |        |       |      |      |
| 4. Age         | -.10   | .06    | .12   | -     |       |       |       |       |       |        |       |      |      |
| 5. IMCP        | -.08   | .03    | .08   | -.25  | -     |       |       |       |       |        |       |      |      |
| 6. EMCP        | -.06   | .18    | .20   | -.01  | .02   | -     |       |       |       |        |       |      |      |
| 7. PT          | .19    | .26    | .09   | .32   | .40*  | -.35  | -     |       |       |        |       |      |      |
| 8. Lay Theory  | .03    | .25    | .20   | -.35  | -.18  | .00   | -.31  | -     |       |        |       |      |      |
| 9. CB Ideology | -.21   | .14    | .26   | .14   | -.26  | -.11  | -.24  | .15   | -     |        |       |      |      |
| 10. Direct     | -.25   | -.46*  | -.23  | -.10  | .43*  | -.10  | .18   | -.43* | -.05  | -      |       |      |      |
| 11. Indirect   | .03    | .04    | .01   | -.07  | .57** | -.11  | .39*  | -.34  | -.09  | .66*** | -     |      |      |
| 12. Overcomp.  | -.33   | .03    | .25   | -.09  | .01   | .28   | -.21  | .02   | .25   | .10    | .07   | -    |      |
| 13. Escape     | -.33   | .25    | .43*  | -.18  | -.21  | .16   | -.44* | .35   | .15   | -.28   | -.24  | .16  | -    |
| M              | 0.22   | 0.17   | -0.05 | 24.11 | 30.63 | 18.19 | 39.67 | 12.04 | 13.52 | 10.93  | 11.41 | 7.67 | 9.00 |
| SD             | 0.25   | 0.31   | 0.36  | 3.04  | 4.93  | 6.94  | 5.60  | 4.33  | 4.89  | 2.34   | 2.10  | 2.40 | 4.78 |

*Note.* IMCP- Internal Motivation to Control Prejudice, EMCP- External Motivation to Control prejudice, PT- Perspective Taking, CB- Colorblind Ideology. Direct, Indirect, Overcompensation and Escape are all strategies for handling an uncomfortable interracial interaction. \*  $p < .05$ ; \*\* $p < .01$ ; \*\*\* $p < .001$

Table S6. Bivariate Correlations and Descriptive Statistics- Non-Target Minority Males Active workshops for reducing implicit bias 39

|                | 1      | 2    | 3    | 4      | 5     | 6     | 7     | 8     | 9     | 10    | 11    | 12   | 13   |
|----------------|--------|------|------|--------|-------|-------|-------|-------|-------|-------|-------|------|------|
| 1. Pre IAT     | -      |      |      |        |       |       |       |       |       |       |       |      |      |
| 2. Post IAT    | .20    | -    |      |        |       |       |       |       |       |       |       |      |      |
| 3. IAT Change  | -.74** | .52* | -    |        |       |       |       |       |       |       |       |      |      |
| 4. Age         | .15    | .07  | -.08 | -      |       |       |       |       |       |       |       |      |      |
| 5. IMCP        | .35    | .15  | -.20 | .41    | -     |       |       |       |       |       |       |      |      |
| 6. EMCP        | -.27   | -.06 | .19  | -.40   | .24   | -     |       |       |       |       |       |      |      |
| 7. PT          | -.04   | .46  | .35  | -.03   | -.08  | -.02  | -     |       |       |       |       |      |      |
| 8. Lay Theory  | -.40   | .02  | .37  | -.43   | -.16  | .54*  | -.15  | -     |       |       |       |      |      |
| 9. CB Ideology | .09    | .10  | -.01 | -.68** | -.59* | .14   | .05   | .15   | -     |       |       |      |      |
| 10. Direct     | -.19   | .29  | .36  | .00    | -.22  | .42   | .46   | .11   | .19   | -     |       |      |      |
| 11. Indirect   | .06    | .34  | .18  | .12    | -.08  | -.09  | .74** | -.13  | -.01  | .49   | -     |      |      |
| 12. Overcomp.  | -.05   | .32  | .26  | .09    | .30   | .05   | .16   | -.34  | -.07  | .17   | -.09  | -    |      |
| 13. Escape     | .28    | .03  | -.22 | .18    | .35   | -.10  | -.40  | -.32  | -.06  | -.23  | -.30  | .21  | -    |
| M              | 0.25   | 0.25 | 0.01 | 23.80  | 30.87 | 18.33 | 39.33 | 16.13 | 15.40 | 11.33 | 11.80 | 8.13 | 9.87 |
| SD             | 0.37   | 0.29 | 0.42 | 1.97   | 3.74  | 8.63  | 6.49  | 7.07  | 4.39  | 2.09  | 1.61  | 2.61 | 4.56 |

*Note.* IMCP- Internal Motivation to Control Prejudice, EMCP- External Motivation to Control prejudice, PT- Perspective Taking, CB- Colorblind Ideology. Direct, Indirect, Overcompensation and Escape are all strategies for handling an uncomfortable interracial interaction. \*  $p < .05$ ; \*\* $p < .01$ ; \*\*\* $p < .001$

Table S7. Bivariate Correlations and Descriptive Statistics- Target Minority Females Active workshops for reducing implicit bias 41

|                | 1     | 2     | 3     | 4     | 5     | 6     | 7     | 8      | 9     | 10    | 11    | 12   | 13   |
|----------------|-------|-------|-------|-------|-------|-------|-------|--------|-------|-------|-------|------|------|
| 1. Pre IAT     | -     |       |       |       |       |       |       |        |       |       |       |      |      |
| 2. Post IAT    | .24   | -     |       |       |       |       |       |        |       |       |       |      |      |
| 3. IAT Change  | -.82* | .35   | -     |       |       |       |       |        |       |       |       |      |      |
| 4. Age         | -.38  | .24   | .51   | -     |       |       |       |        |       |       |       |      |      |
| 5. IMCP        | .75   | .17   | -.63  | .23   | -     |       |       |        |       |       |       |      |      |
| 6. EMCP        | -.67  | -.05  | .62   | .44   | -.40  | -     |       |        |       |       |       |      |      |
| 7. PT          | .76*  | .74*  | -.31  | -.24  | .47   | -.38  | -     |        |       |       |       |      |      |
| 8. Lay Theory  | -.62  | -.48  | .32   | .06   | -.44  | .58   | -.57  | -      |       |       |       |      |      |
| 9. CB Ideology | -.03  | -.35  | -.18  | -.10  | -.12  | .44   | -.24  | .30    | -     |       |       |      |      |
| 10. Direct     | .64   | .23   | -.48  | .04   | .71*  | -.39  | .41   | -.79*  | -.18  | -     |       |      |      |
| 11. Indirect   | .77*  | .50   | -.45  | -.08  | .58   | -.70  | .74*  | -.87** | -.36  | .59   | -     |      |      |
| 12. Overcomp.  | -.09  | -.52  | -.22  | -.21  | -.23  | -.21  | -.41  | -.31   | .04   | .15   | .14   | -    |      |
| 13. Escape     | -.29  | -.50  | -.01  | -.43  | -.47  | -.23  | -.34  | .39    | -.37  | -.55  | -.22  | .35  | -    |
| M              | 0.01  | -0.09 | -0.10 | 23.62 | 30.88 | 16.38 | 37.38 | 12.00  | 14.38 | 11.12 | 11.00 | 6.75 | 9.88 |
| SD             | 0.48  | 0.29  | 0.50  | 1.85  | 4.22  | 7.54  | 7.42  | 7.21   | 4.78  | 2.85  | 2.88  | 1.39 | 4.61 |

*Note.* IMCP- Internal Motivation to Control Prejudice, EMCP- External Motivation to Control prejudice, PT- Perspective Taking, CB- Colorblind Ideology. Direct, Indirect, Overcompensation and Escape are all strategies for handling an uncomfortable interracial interaction. \*  $p < .05$ ; \*\* $p < .01$ ; \*\*\* $p < .001$

Table S8. Bivariate Correlations and Descriptive Statistics- Target Minority Males

Active workshops for reducing implicit bias 43

|                | 1     | 2     | 3    | 4     | 5     | 6      | 7     | 8     | 9     | 10    | 11    | 12   | 13   |
|----------------|-------|-------|------|-------|-------|--------|-------|-------|-------|-------|-------|------|------|
| 1. Pre IAT     | -     |       |      |       |       |        |       |       |       |       |       |      |      |
| 2. Post IAT    | .28   | -     |      |       |       |        |       |       |       |       |       |      |      |
| 3. IAT Change  | -.83* | .30   | -    |       |       |        |       |       |       |       |       |      |      |
| 4. Age         | .27   | .39   | -.05 | -     |       |        |       |       |       |       |       |      |      |
| 5. IMCP        | .58   | .18   | -.47 | .46   | -     |        |       |       |       |       |       |      |      |
| 6. EMCP        | .51   | .71*  | -.10 | .68   | .21   | -      |       |       |       |       |       |      |      |
| 7. PT          | .54   | .38   | -.31 | .08   | .07   | .18    | -     |       |       |       |       |      |      |
| 8. Lay Theory  | -.37  | .49   | .65  | .26   | -.47  | .42    | .13   | -     |       |       |       |      |      |
| 9. CB Ideology | .19   | .29   | -.01 | .77   | .41   | .64    | -.21  | .19   | -     |       |       |      |      |
| 10. Direct     | .03   | -.54  | -.35 | -.30  | -.10  | -.33   | .13   | .04   | -.33  | -     |       |      |      |
| 11. Indirect   | -.39  | -.83* | -.09 | -.53  | -.29  | -.86** | -.15  | -.37  | -.71* | .51   | -     |      |      |
| 12. Overcomp.  | .11   | .65   | .27  | .48   | .55   | .41    | .14   | .33   | .61   | -.27  | -.71* | -    |      |
| 13. Escape     | -.35  | .54   | .66  | .16   | .06   | -.01   | .26   | .48   | .16   | -.33  | -.34  | .75* | -    |
| M              | -0.17 | 0.09  | 0.26 | 28.00 | 30.62 | 12.38  | 39.62 | 12.50 | 14.50 | 11.00 | 11.88 | 8.00 | 9.00 |
| SD             | 0.55  | 0.32  | 0.55 | 4.50  | 6.30  | 7.56   | 6.89  | 4.99  | 5.18  | 3.02  | 2.03  | 2.78 | 6.00 |

*Note.* IMCP- Internal Motivation to Control Prejudice, EMCP- External Motivation to Control prejudice, PT- Perspective Taking, CB- Colorblind Ideology. Direct, Indirect, Overcompensation and Escape are all strategies for handling an uncomfortable interracial interaction. \*  $p < .05$ ; \*\* $p < .01$ ; \*\*\* $p < .001$
